# Supplementary material for: Late killing of Plasmodium berghei sporozoites in the liver by an anti-circumsporozoite protein antibody
Source: eLife. 2025 Feb 14;14:RP105291. doi: 10.7554/eLife.105291 (PMC11828480; doi:10.7554/eLife.105291)
Supplement: Source data 1. [file elife-105291-data1.xlsx]

## Sheet: Figure 1 
3D11								W24 group
skin 5000 spz								skin 5000 spz
Mouse No.	D3	D4	D5	D6	D7	D10		Mouse No.	D3	D4	D5	D6	D7	D10		*Limit of detection 0.0001 -> 0 was replace by 0.0001 to calculate the log10
1	0*	0	0	0	0	/		1	0.00122824	0.0208015	0.151831	1.11199	/
2	0	0	0	0	0	/		2	0.00185115	0.00937037	0.0837523	0.873863	/
3	0	0	0	0	0	/		3	0.00556764	0.0479296	0.3634	1.78977	/
4	0	0	0	0	0	/		4	0.00490553	0.0547445	0.38414	4.78959	/
5	0	0	0	0	0	/		5	0.000612377	0.00285195	0.016748	0.182022	/
6	0	0	0	0	0	/		6	0.0001	0.00181359	0.0122104	0.0669252	/
7	0	0	0	0	0	/		7	0.00266526	0.0218683	0.155491	0.905318	/
average	0	0	0	0	0	0		average	0.0024186	0.0227686	0.166796	1.3885
i.v. 1000 spz								i.v. 1000 spz
Mouse No.	D3	D4	D5	D6	D7	D10		Mouse No.	D3	D4	D5	D6	D7	D10
1	0.00222881	0.0198863	0.153157	1.09683	7.74191	/		1	0.0022768	0.0254744	0.189705	1.23262	/
2	0	0	0	0.00181962	0.0127221	/		2	0.00335837	0.034867	0.228392	1.68983	/
3	0	0.00304499	0.0207832	0.20165	1.56968	/		3	0.00167425	0.0112801	0.118425	1.23392	/
4	0.000405959	0.00243558	0.0129731	0.146579	1.87737	/		4	0.000828373	0.00902657	0.0949029	1.01721	/
5	0.000610779	0.0076986	0.0529488	0.604566	2.27437	/		5	0.00205841	0.0122405	0.0947511	0.836122	/
6	0	0.00040696	0.00995834	0.0642668	0.563994	/		6	0.00164288	0.00692452	0.0541473	0.48851	/
7	0	0	0.00163607	0.0484487	0.639411	/		7	0.00143802	0.0166741	0.107704	1.01447	/
average	0.00046365	0.00478177	0.0359223	0.309166	2.09706			average	0.00189673	0.016641	0.126861	1.07324
bite challenge								bite challenge
Mouse No.	D3	D4	D5	D6	D7	D10		Mouse No.	D3	D4	D5	D6	D7	D10
1	0.0001	0.0001	0.0001	0.0001	0.0001	0.0001		1	0.000811955	0.0146091	0.112166	1.25771	/	/
2	0.0001	0.0001	0.0001	0.0001	0.0001	0.0001		2	0.000205681	0.00368078	0.0223011	0.313284	/	/
3	0.0001	0.0001	0.0001	0.0001	0.0001	0.0001		3	0.000609138	0.00244235	0.0250092	0.254677	/	/
4	0.0001	0.0001	0.0001	0.0001	0.0001	0.0001		4	0.00127485	0.0194155	0.164184	2.29658	/	/
5	0.0001	0.0001	0.000811588	0.0172433	0.145766	/		5	0.000405819	0.00506254	0.0246121	0.224587	/	/
6	0.0001	0.0001	0.0001	0.0001	0.0001	0.0001		6	0.0001	0.000610545	0.00690748	0.0676803	0.639133	/
average	0.0001	0.0001	0.000218598	0.00295722	0.0243776			average	0.000567908	0.0076368	0.0591965	0.735753
Titration i.v. injection 1000 spz
	D4	D5
PBS_1	0.0778	0.795
PBS_2	0.073	0.5814
PBS_3	0.0726	0.6774
3D11 100µg_1	0.0078	0.0568
3D11 100µg_2	0.0038	0.0306
3D11 100µg_3	0.0042	0.0424
3D11 300µg_1	0.0004	0.0082
3D11 300µg_2	0.0006	0.006
3D11 300µg_3	0.0002	0.0034

## Sheet: Figure 2 
Hours	Control (Total flux [p/s])					3D11 (Total flux [p/s])
7	296000	94100	248000	71300	65100	400000	119000	40000	119000	79200
240	171000	62800	114000	28200	33700	76400	67500	22900	50400	27100
1440	3080000	1830000	3640000	330000	608000	147000	85500	25700	49700	23900
2640	99400000	36200000	170000000	5870000	13700000	2260000	1280000	383000	790000	403000
4320			1881000	2301000	1103000			370700000	23760000	55540000

## Sheet: Figure 3
In vivo imaging
	pooled number of sporozoites moving in 4 different experiments (8.2, 8.3, 8.4, 8.6)
	Bin Center (min)	Pb motile	Pb immotile	PbPf motile	PbPf immotile
	0	15	15	29	5
	30	2	26	15	15
	60	2	7	5	4
	120	0	3	0	3
	Location of sporozoites using FLIK+ mice (experiment 8.2, 8.3)
	PbmCherry	spz (n)	total	percentage				PbmCherry	spz (n)	total	percentage
	vessel	8		57.1429				vessel	5		35.7143
	parenchyma	6		42.8571				parenchyma	9		64.2857
	crossing	0	14	0				crossing	0	14	0
	PbPf GFP	spz (n)	total	percentage				PbPf GFP	spz (n)	total	percentage
	vessel	1		10				vessel	1		12.5
	parenchyme	9		90				parenchyme	7		87.5
	crossing	0	10	0				crossing	0	8	0
		between 0.5 and 3 hours after injection						between 0.5 and 2 hours after injection
Ex vivo imaging
	Location of sporozoites using FLIK+ mice (experiment 8.7, 8.10)
	PbmCherry	spz (n)	total	percentage				PbmCherry	spz (n)	total	percentage
	vessel	6		40				vessel	15		46.875
	parenchyma	7		46.6667				parenchyma	17		53.125
	crossing	2	15	13.3333				crossing	0	32	0
	PbPf GFP	spz (n)	total	percentage				PbPf GFP	spz (n)	total	percentage
	vessel	1		4.54545				vessel	0		0
	parenchyme	21		95.4545				parenchyme	12		100
	crossing	0	22	0				crossing	0	12	0
	between 1 and 2 hours after injection							between 1 and 3 hours after injection

## Sheet: Figure 4
	Invasion 2 h ( % from control) independed experiments									Cytotoxicity ( % from control) independed experiments
	Concentration 3D11 [µg/ml]									Concentration 3D11 [µg/ml]
	5	5.92097	11.3614	7.88827	10.9835	16.0837	13.4742	10.9292		5	12.6233	9.063	10.99	12.5433
	2.5	11.4594	16.8966	16.4614	20.0536	33.4367	32.678	16.1188		2.5	37.4933		29.12	21.7333
	1.25	35.7245	49.4945	34.225	46.141	68.0715	85.576	46.6391		1.25	77.88		77.54	43.9
	0.625	52.8931	79.3315	73.9245	81.4313	91.386	99.0717	88.8366		0.6	104.96		125.457	87.3833
	0.0006	95.0734	123.38	98.9176	116.086	99.7081	104.021	100		0.006	79.42		101.73	96.5033
	Development 15 h ( % from control) independed experiments									MeanFITC-A intracellular parasites 44 h post-infection independed experiments
	5	5.53589	3.36519	3.04715						5	1357278	1252004	1.38113e+06
	2.5	22.336	5.8895	5.2644						2.5	1765086	1474274	1.87228e+06
	1.25	50.8261	23.4008	22.0124						1.25	2536133	1827961	2.14666e+06
	0.625	119.777	47.8574	59.4347						0.6	2637123	2493801	2.23349e+06
	0.0006	92.1347	84.1338	106.111						0.006	2575029	2534567	2.22998e+06
	Development 44 h ( % from control) independed experiments
	5	2.27924	2.71585	3.7058	7.21901
	2.5	4.89413	8.93376	10.1189	18.0026
	1.25	24.5598	28.4062	31.0503	48.3927
	0.6	55.96	65.981	55.8791	104.331
	0.006	91.5084	99.8276	94.4207	111.56
	Development 44 h ( % from control) independed experiments
		3D11 2 h post-infection			3D11 added with spz
	5	115.287	100.176		2.53856	4.05927
	2.5	117.424	87.0248		10.7647	4.58351
	1.25	98.3908	90.0139		31.7616	12.1318
	0.6	102.692	98.234		106.355	42.708
	0.006	105.675	93.5602		68.3814	119.38

## Sheet: Figure 5
Projected area [µm2]			GFP MFI			UIS4 MFI			Experiment number	8.16				8.17				total				Inside cells
Control	3D11		Control	3D11		Control	3D11		CONTROL	3D11+	UIS4+	UIS4- 3D11-		3D11+	UIS4+	UIS4- 3D11-		3D11+	UIS4+	UIS4- 3D11-	total spz	total
53.196	130.774		1057.8	741.989		1996.28	4237.2		2h	32	74	14		26	71	10		58	145	24	227	169
172.395	240.367		1131.53	1083.78		5320.35	9972.44		4h	12	72	7		22	78	7		34	150	14	198	164
162.051	178.305		1419.85	1144.07		8202.43	7028.8		44h		38	3			52	3			90	6	96	96
86.197	476.056		1542.6	1226.51		10775.3	11762.6
154.17			1229.55			6637.29			3D11
93.339	41.621		1741.51	748.391		14465.4	3880.98		2h	28	15	17		32	18	13		60	33	30	0	63
100.235	162.79		1280.73	890.365		2729.28	1553.52		4h	17	26	6		38	14	6		55	40	12	107	52
233.964	438.129		1854.85	1282.22		28449.4	12497.9		44h		8	2			12	2			20	4	24	24
164.021	204.165		2071.82	1322.16		10209.7	10965.3
189.634	324.841		1603.77	2000.16		10427.5	19090.2
329.028	248.741		2039.37	1189		23613.7	13088.7
192.097	154.416		1736.27	1282.25		13226.1	18219.5
308.094	231.255		1790.23	1265.98		19947.7	15462.1
207.366			1939.59			13261.6
158.603	16.008		2021.38	673.292		17197.8	2286.63
	135.453			1403			9708.92
	105.653			993.31			3143.16
400.695	335.185		940.764	1593.27		3351.59	16391.4
238.151	161.066		1125.31	1245.63		6177.63	11191.9
224.113	227.807		1042.23	1647.26		3046.87	19465
223.374	215.001		1206.14	1691.34		7926.77	18126.6
129.542	323.856		1447.29	1155.29		6129.15	16729.4
319.423			1559.1			10721
172.148	85.459		1108.36	1596.71		7930.18	4849.56
650.913			1228.24			6535.5
102.698			1334.69			3950.44
152.692			1364.17			9006.08
151.215	124.37		1560.05	1012.8		9267	4363.65
352.917	300.213		1569.13	1326.74		11013.4	8332.55
292.578	115.751		1300.52	1120.72		15558.5	985.753
270.906	195.052		2053.73	1437.66		17559.2	14789.9
236.427	247.756		1493.37	1016.87		8232.25	2751.95
88.66	223.867		1834	1746.66		16802.6	19001.4
128.311	193.082		1259.73	1767.83		4145.82	12944.6
44.576	16.254		1192.41	961.47		16394.9	1682.83
280.265	146.782		2435.76	1575.23		20078.4	10437.5
224.852	372.126		1922.78	1691.65		12599.3	17033.2
343.065	141.117		1405.4	1184.88		14752.1	15878.3
91.615			1920.46			5482.37
136.192			1603.63			2333.85
238.644			1740.24			14475.5
127.08			2147.99			21248.3
219.188			1304.97			7123.66
272.137			1521.09			11531.1
156.14			1419.25			9576.91
312.281			1426.69			9849.8
251.696			1302.74			6784.89
177.813	145.55					882.967	17119.9
375.082	278.541		756.871	1199.89		4401.9	25618.2
343.312	139.393		1110.73	2118.18		12573.6	2122.09
350.454	301.198		1238.21	1963.2		10639.3	15529.5
209.336	348.976		1268.93	916.962		6259.44	13215.3
221.897	218.449		1185.94	1690.85		6613.14	13361.2
162.297			1404.78	1453.51		4866.41
363.014			1404.3			6451.9
297.75			1571.82			6721.09
139.886			1545.89			6815.03
186.186			1187.63			3875.78
189.142			1337.15			10219.7
188.895			1848.95			5352.22
231.501			1389.01			10028.1
207.366			1459.78			11408.1
278.541			1189.96			2507.74
177.32			1528.03			7411.1
162.051			1605.51			8995.76
174.857			1732.73			17155.1
171.902			1927.7			13402.4
105.407			1603.11			12456.7
425.076			723.907			15555.9
133.236			1707.42			7021.98
362.521			1555.63			14214.2
195.299			1446.84			9322.79
40.882			1276			1839.6
155.894			734.566			7962.5
			1132.58
